# Supplementary material for: Determining the burden of missed opportunities for vaccination among children admitted in healthcare facilities in India: a cross-sectional study
Source: HighWire-hosted journal article supplement (doi:10.1136/bmjopen-2020-046464), 2021-03-01
Supplement: bmjopen-2020-046464supp001_data_supplement.pdf [file bmjopen-2020-046464supp001_data_supplement.pdf]

## Supplementary Data

**Table S1. Characteristics of enrolled children, their caregivers, and the household (N = 263)**

|                                                 | n   | (%)   |
|-------------------------------------------------|-----|-------|
| <b>Child Age (Months)</b>                       |     |       |
| Minimum                                         | 1   |       |
| Mean                                            | 13  |       |
| Median                                          | 7   |       |
| Maximum                                         | 58  |       |
| <b>Child Gender</b>                             |     |       |
| Male                                            | 152 | 57.8% |
| Female                                          | 111 | 42.2% |
| <b>Child Order</b>                              |     |       |
| First-born                                      | 119 | 45.2% |
| Second-born                                     | 87  | 33.1% |
| Third-born                                      | 36  | 13.7% |
| Fourth-born or younger                          | 21  | 8.0%  |
| <b>Caregiver Age (Years)</b>                    |     |       |
| Minimum                                         | 18  |       |
| Mean                                            | 27  |       |
| Median                                          | 25  |       |
| Maximum                                         | 63  |       |
| <b>Caregiver Gender<sup>1</sup></b>             |     |       |
| Male                                            | 56  | 21.4% |
| Female                                          | 206 | 78.6% |
| <b>Relationship to Child<sup>2</sup></b>        |     |       |
| Mother                                          | 192 | 73.3% |
| Father                                          | 50  | 19.1% |
| Aunt / Uncle                                    | 11  | 4.2%  |
| Grandparent                                     | 9   | 3.4%  |
| <b>Can caregiver read and write</b>             |     |       |
| Yes                                             | 203 | 77.2% |
| No                                              | 60  | 22.8% |
| <b>Caregiver level of education<sup>3</sup></b> |     |       |
| No formal education / did not complete primary  | 58  | 22.1% |
| Primary / middle school                         | 35  | 13.4% |
| High School                                     | 84  | 32.1% |
| College and postgraduate                        | 85  | 32.4% |
| <b>Household Religion</b>                       |     |       |
| Hindu                                           | 205 | 77.9% |
| Muslim                                          | 46  | 17.5% |

|                                                                                                                                           |     |       |
|-------------------------------------------------------------------------------------------------------------------------------------------|-----|-------|
| Sikh                                                                                                                                      | 12  | 4.6%  |
| <b>Primary Residence</b>                                                                                                                  |     |       |
| Urban                                                                                                                                     | 86  | 32.7% |
| Rural                                                                                                                                     | 160 | 60.8% |
| Suburban                                                                                                                                  | 17  | 6.5%  |
| <b>Household Total</b>                                                                                                                    |     |       |
| Minimum                                                                                                                                   | 3   |       |
| Mean                                                                                                                                      | 8   |       |
| Median                                                                                                                                    | 7   |       |
| Maximum                                                                                                                                   | 26  |       |
| <b>Child been in contact with another health center before today<sup>4</sup></b>                                                          |     |       |
| Yes                                                                                                                                       | 138 | 53.7% |
| No                                                                                                                                        | 119 | 46.3% |
| <b>When was child admitted to the other health center<sup>5</sup></b> (denominator includes those with prior health center contact - 138) |     |       |
| Within last month                                                                                                                         | 66  | 47.8% |
| 1 – 6 months                                                                                                                              | 45  | 32.6% |
| Over 6 months                                                                                                                             | 27  | 19.6% |
| <b>Makes the primary decisions on vaccination in the household<sup>6</sup></b>                                                            |     |       |
| Mother                                                                                                                                    | 142 | 55.3% |
| Father                                                                                                                                    | 19  | 7.4%  |
| Consensus of father and mother                                                                                                            | 72  | 28.0% |
| Grandparent or other relative                                                                                                             | 24  | 9.3%  |
| <b>Distance of this hospital (PGIMER or SMS) from residence<sup>7</sup></b>                                                               |     |       |
| 0-5 km                                                                                                                                    | 24  | 9.3%  |
| 6-10 km                                                                                                                                   | 20  | 7.8%  |
| 11-50 km                                                                                                                                  | 26  | 10.1% |
| >50 km                                                                                                                                    | 188 | 72.9% |
| <b>Distance of any health facility from residence<sup>8</sup></b>                                                                         |     |       |
| 0-5 km                                                                                                                                    | 177 | 68.9% |
| 6-10 km                                                                                                                                   | 60  | 23.3% |
| 11-50 km                                                                                                                                  | 18  | 7.0%  |
| >50 km                                                                                                                                    | 2   | 0.8%  |
| <b>Child has a vaccination card</b>                                                                                                       |     |       |
| Yes, present at hospital                                                                                                                  | 154 | 58.6% |
| Yes, absent at hospital                                                                                                                   | 89  | 33.8% |
| No                                                                                                                                        | 20  | 7.6%  |
| <b>Source of Immunization History</b>                                                                                                     |     |       |
| Immunization card                                                                                                                         | 157 | 59.7% |
| Parental recall                                                                                                                           | 106 | 40.3% |
| <b>Immunization Status</b>                                                                                                                |     |       |
| Fully Vaccinated                                                                                                                          | 91  | 34.6% |
| Partially Vaccinated                                                                                                                      | 158 | 60.1% |

---

|                                                                                               |    |      |
|-----------------------------------------------------------------------------------------------|----|------|
| Unvaccinated                                                                                  | 14 | 5.3% |
| <sup>1</sup> 1 respondent missing                                                             |    |      |
| <sup>2</sup> 1 respondent missing                                                             |    |      |
| <sup>3</sup> 1 respondent missing                                                             |    |      |
| <sup>4</sup> 6 respondents missing                                                            |    |      |
| <sup>5</sup> Denominator is 138 children in contact with another health facility before today |    |      |
| <sup>6</sup> 6 respondents missing                                                            |    |      |
| <sup>7</sup> 5 respondents missing                                                            |    |      |
| <sup>8</sup> 6 respondents missing                                                            |    |      |

**Table S2. Additional vaccine coverage (N = 263)**

| Vaccine Dose                                             | Sample Immunization Status |              |          |
|----------------------------------------------------------|----------------------------|--------------|----------|
|                                                          | Vaccinated                 | Age Eligible | Coverage |
|                                                          | N                          | N            | (%)      |
| f-IPV <sup>1</sup> Dose 1                                | 108                        | 263          | 41.1%    |
| f-IPV <sup>1</sup> Dose 2                                | 52                         | 204          | 25.5%    |
| Rotavirus Dose 1                                         | 74                         | 263          | 28.1%    |
| Rotavirus Dose 2                                         | 55                         | 225          | 24.4%    |
| Rotavirus Dose 3                                         | 35                         | 204          | 17.2%    |
| Measles 2 (Measles, MR <sup>2</sup> , MMR <sup>3</sup> ) | 18                         | 44           | 40.9%    |
| OPV <sup>4</sup> Booster                                 | 25                         | 44           | 56.8%    |
| DPT <sup>5</sup> Booster                                 | 26                         | 44           | 59.1%    |

<sup>1</sup> Fractional dose of inactivated poliovirus vaccine (f-IPV).

<sup>2</sup> Measles -rubella (MR) vaccine.

<sup>3</sup> Measles-mumps-rubella (MMR) vaccine.

<sup>4</sup> Oral poliovirus vaccine (OPV).

<sup>5</sup> Diphtheria-tetanus-pertussis (DPT) vaccine.

**Table S3. Full vaccination coverage by site compared to state coverage rates (Rajasthan and Chandigarh, NFHS-4)**

| Fully vaccinated Jaipur study site |       | Fully vaccinated (Jaipur District, NFHS-4) |                  | Fully vaccinated Chandigarh study site |      | Fully vaccinated (Chandigarh, NFHS-4) |                  |
|------------------------------------|-------|--------------------------------------------|------------------|----------------------------------------|------|---------------------------------------|------------------|
| n                                  | %     | n <sup>1</sup>                             | % <sup>1,2</sup> | n                                      | %    | n <sup>1</sup>                        | % <sup>1,2</sup> |
| 66                                 | 32.8% | 5582                                       | 58.2             | 25                                     | 40.3 | 29                                    | 79.5             |

1 International Institute for Population Sciences (IIPS) and ICF. National Family Health Survey (NFHS-4) 2015-16 [Dataset]. Data Extract from IAIR72.SAV, IAKR72.SAV, IABR72.SAV, IAMR74.SAV, and IAPR74.SAV. IPUMS Demographic and Health Surveys (IPUMS DHS), 2018. [2]

2 Ministries of Health and Family Welfare. National Family Health Survey - 4 District Fact Sheet Jaipur Rajasthan. 2015.

[http://rchiips.org/nfhs/FCTS/RJ/RJ\\_FactSheet\\_110\\_Jaipur.pdf](http://rchiips.org/nfhs/FCTS/RJ/RJ_FactSheet_110_Jaipur.pdf) [4]

3 Ministries of Health and Family Welfare. National Family Health Survey-4 State Fact Sheet Chandigarh. *Natl Fam Heal Surv - 4, Demogr Heal Surv* 2015. [http://rchiips.org/nfhs/pdf/NFHS4/CH\\_FactSheet.pdf](http://rchiips.org/nfhs/pdf/NFHS4/CH_FactSheet.pdf) [5]
